# Supplementary material
Source: MDPI journal article supplement (https://www.mdpi.com/2072-4292/13/3/367)
Supplement: s1 [file s1]

## Sheet: SuplementaryTable
	Table 1. Classification agreement of systematic Landsat samples in Amazon Biome
		Reference
	Amazon	Forest	Non-forest	Total		Users accuracy	confidence interval
Classification	Forest	560	31	591		0.965517	0.0148624
	Non-forest	20	164	184		0.841026	0.0514536
	Total	580	195	775			confidence interval
					Overall accuracy	0.934	0.016
	Producers accuracy	0.948332	0.889753
	confidence interval	0.000682898	0.0164353
	Table 2. Classification agreement of systematic Landsat samples in Cerrado Biome
		Reference
	Cerrado	Forest	Non-forest	Total		Users accuracy	confidence interval
Classification	Forest	67	43	110		0.656863	0.0925888
	Non-forest	35	394	429		0.901602	0.027958
	Total	102	437	539			confidence interval
					Overall accuracy	0.850457	0.0293848
	Producers accuracy	0.638149	0.908641
	confidence interval	0.04436	0.0676196
